# Supplementary material for: Boosting green EMI shielding and piezoelectric energy generation by defect-driven microstructure manipulation
Source: Royal Society of Chemistry journal article supplement (doi:10.1039/d4tc02179g), 2024-01-01
Supplement: d4tc02179g1.pdf [file d4tc02179g1.pdf]

## Supporting Information

---

### **Boosting the Green EMI Shielding and Piezoelectric Energy Generation by Defect-Driven Microstructure Manipulations**

Prem Pal Singh, Rohit S. Nair, Bhanu Bhusan Khatua\*

Materials Science Centre, Indian Institute of Technology Kharagpur, Kharagpur -721302,  
India.

\*Corresponding author-

Prof. B. B. Khatua (Email: [khatuabb@matsc.iitkgp.ac.in](mailto:khatuabb@matsc.iitkgp.ac.in))

Materials Science Centre, Indian Institute of Technology Kharagpur, Kharagpur - 721302,  
India

Tel.: +91- 3222-283982

## 1. EDS spectra and elemental mapping of LKN nanoparticles

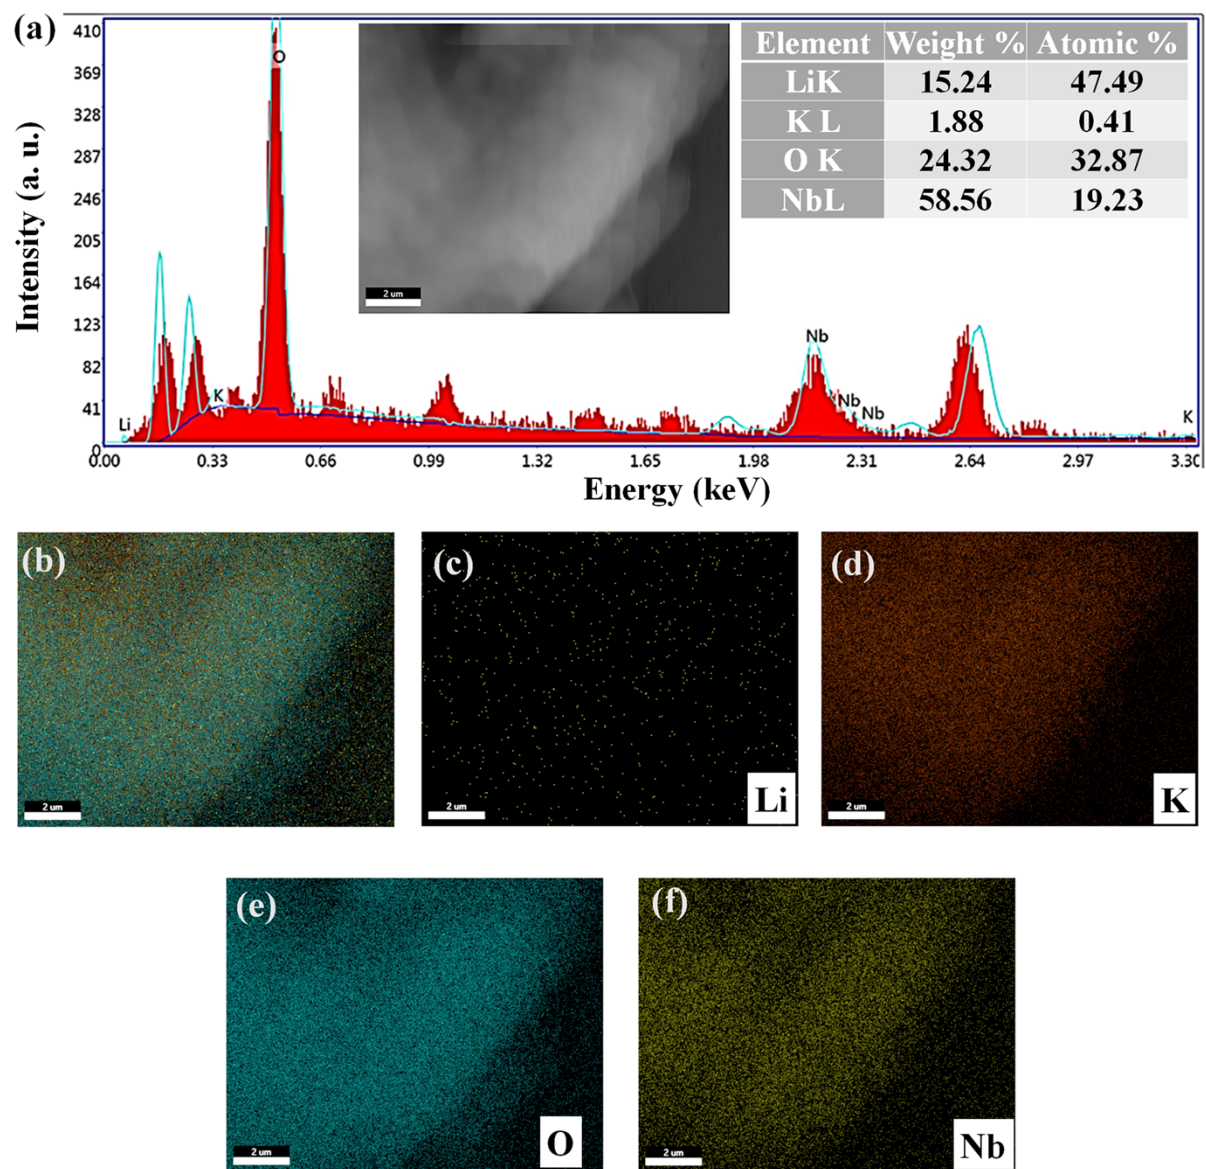

**Fig. 1S.** EDS spectra and elemental mapping of LKN nanoparticles.

## 2. EDS spectra and elemental mapping of GNLKN nanoparticles

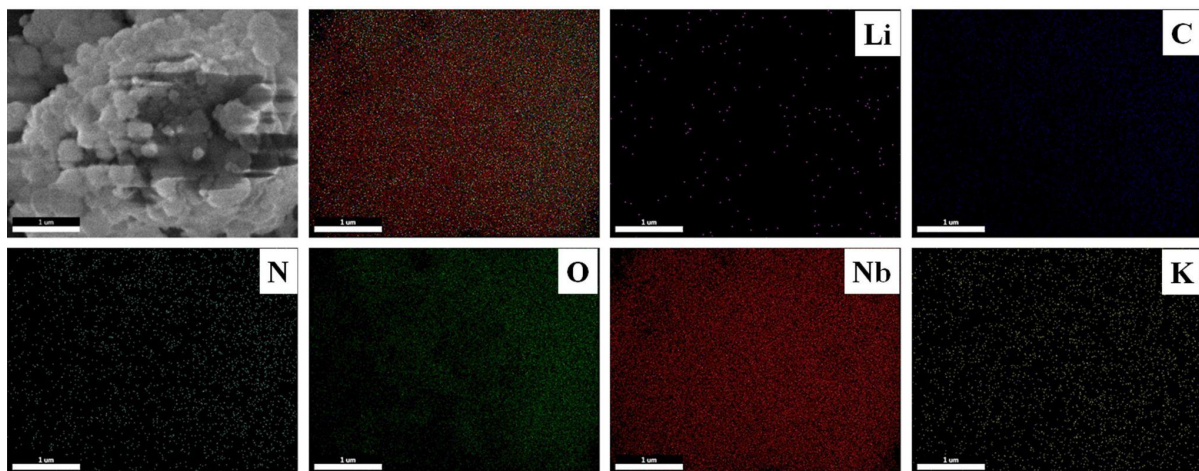

Fig. 2S. EDS elemental mapping of GNLKN nanoparticles.

## 3. EDS spectra and elemental mapping of composite

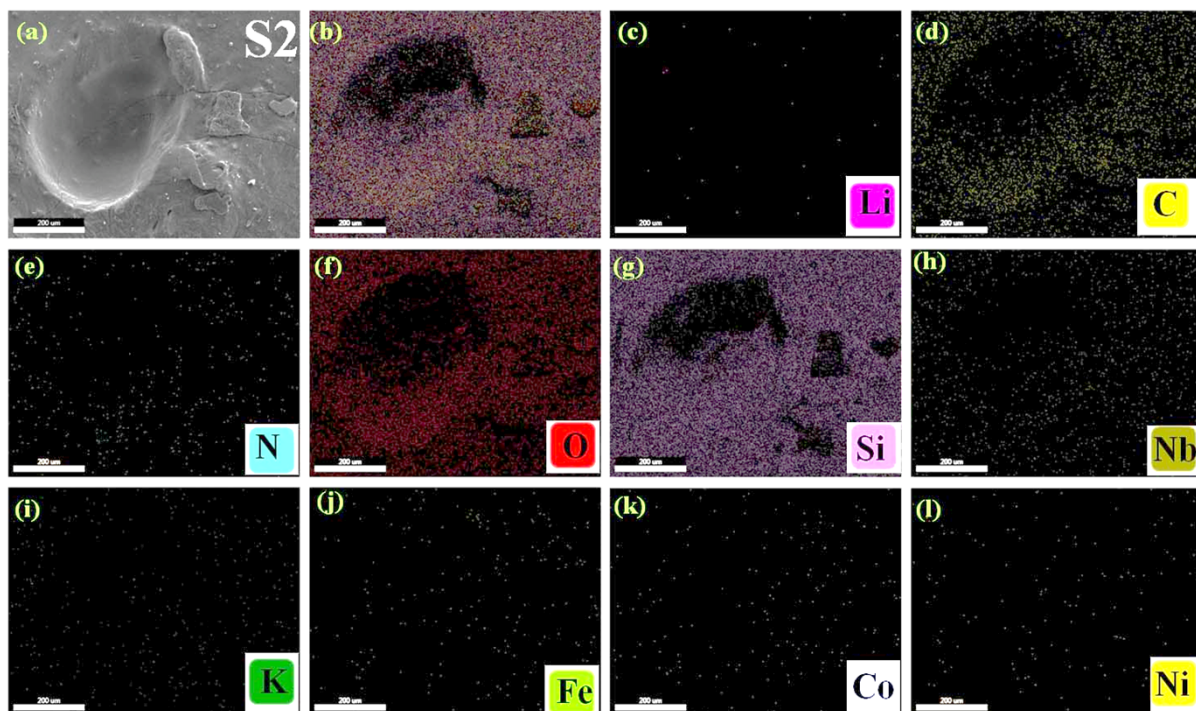

Fig. 3S. EDS elemental mapping of S2 composite.

## 5. EMI shielding performance of PDMS film, BC1 and BC2 composites

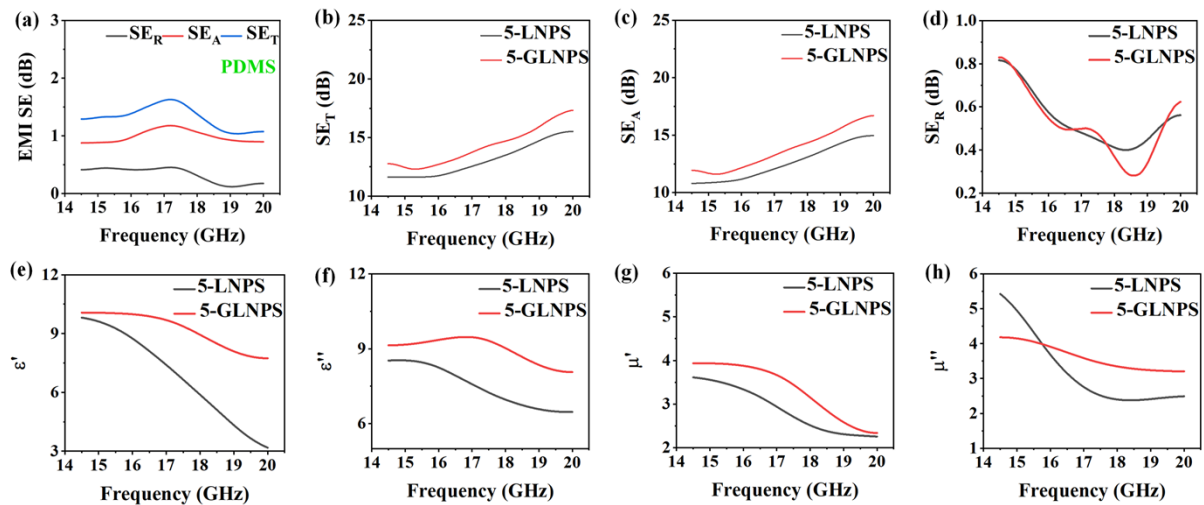

**Fig. 4S.** (a)  $SE_T$ ,  $SE_A$ ,  $SE_R$  of PDMS film, (b-c)  $SE_T$ ,  $SE_A$ ,  $SE_R$  of bulk composites 5-LNPS and 5-GLNPS, (e, f) real and imaginary permittivity of 5-LNPS and 5-GLNPS, (g, h) real and imaginary permeability of 5-LNPS and 5-GLNPS.

## 6. Finger imparting force calculation

A physical model consisting of the gravity term and pulse term was adopted to calculate the imparting pressure. When an object (finger) falls on the composite, it should comply with the main criteria: (i) first, it should touch the surface, and (ii) it should complete the action on the surface of the composite. Hence, the following equations could be introduced based on momentum and kinetic energy theorem.<sup>1,2</sup>

$$m.g.h = \frac{1}{2} m.V^2 \quad (1S)$$

$$(F - m.g).\Delta t = mV \quad (2S)$$

$$\sigma = \frac{F}{A} \quad (3S)$$

Where  $m$  is the mass of the object (finger) (kg),  $h$  is the height of mass falling (in meters),  $\sigma$  is the applied mechanical pressure,  $V$  is the maximum falling velocity (m/s) load,  $F$  is the

contact force, and  $\Delta t$  is the time span. Approximate applied pressure values are calculated by inserting calibrated and measured values data.

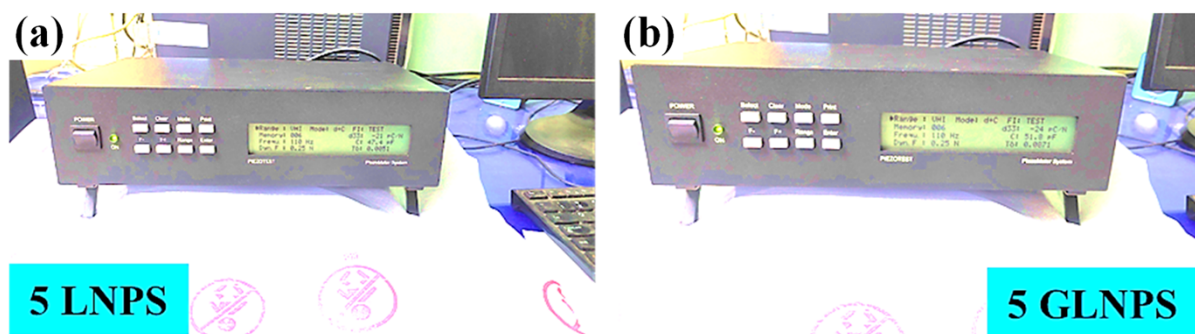

Fig. 5S. digital images captured during the  $d_{33}$  measurement instrument.

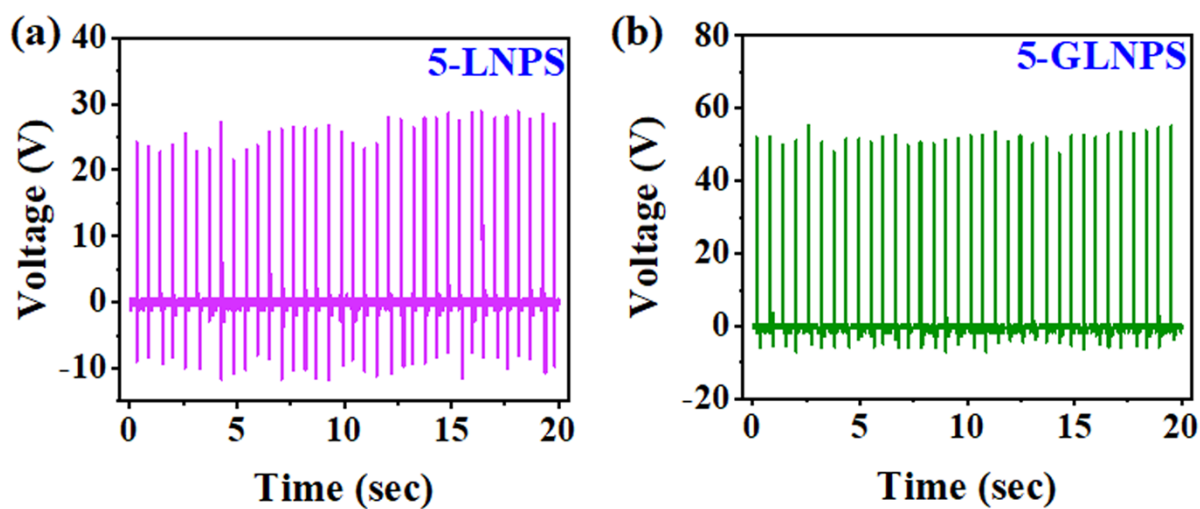

Fig. 6S. Piezoelectric output of poled 5-LNPS and 5-GLNPS devices.

## References

1. P.P. Singh, B.B. Khatua, ACS Appl. Mater. Interfaces., 2024, **16**, **8**, 11050–11061.
2. P.P. Singh, A. Mondal, P. Maity, S. Ojha, G. Hati, B.B. Khatua, App. Mater. Today., 2024, **36**, 102043.
